# Supplementary material for: New Cu(i) square grid-type and Ni(ii) triangle-type complexes: synthesis and characterization of effective binders of DNA and serum albumins
Source: Royal Society of Chemistry journal article supplement (doi:10.1039/d2dt02271k), 2022-01-01
Supplement: d2dt02271k1.pdf [file d2dt02271k1.pdf]

## *Electronic Supplementary Information*

### **New Cu(I) square grid-type and Ni(II) triangle-type complexes: synthesis and characterization of effective binders of DNA and serum albumins**

**Martyna Szymańska<sup>a</sup>, Maciej Kubicki<sup>a</sup>, Giovanni N. Roviello<sup>b</sup>, Giuseppe Consiglio<sup>c</sup>, Marta A. Fik-Jaskółka<sup>a\*</sup> and Violetta Patroniak<sup>a</sup>**

<sup>a</sup>Faculty of Chemistry, Adam Mickiewicz University, Uniwersytetu Poznańskiego 8, 61-614 Poznań, Poland

<sup>b</sup> Institute of Biostructures and Bioimaging – CNR, Area di Ricerca site and Headquarters, Via Tommaso De Amicis, 95, 80145 Napoli, Italy

<sup>c</sup>Dipartimento di Scienze Chimiche, Università degli studi di Catania, viale A. Doria 6, I-95125 Catania, Italy

\*Corresponding author

E-mail address: [martafik@amu.edu.pl](mailto:martafik@amu.edu.pl)

*Dedicated to Professor Paolo Finocchiaro on the occasion of 80<sup>th</sup> birthday.*

*Table S1 Relevant geometrical parameters (Å, °) with su's in parentheses. <sup>i</sup> denotes the symmetry operation 1-x, 1-y, 1-z. For C2 three large angles around Ni centers are listed. A and B are mean planes of the quinoline moieties in the ligand molecules.*

| <b>C1</b>             |          | <b>C2</b> |          |
|-----------------------|----------|-----------|----------|
| Cu1-N19A              | 2.002(2) | Ni1-N1A   | 2.174(4) |
| Cu1-N19B <sup>i</sup> | 2.007(2) | Ni1-N1C   | 2.200(4) |
| Cu1-N22A              | 2.055(2) | Ni1-N12A  | 2.086(4) |
| Cu1-N22B <sup>i</sup> | 2.051(2) | Ni1-N12C  | 2.074(4) |
| Cu2-N1A               | 2.025(2) | Ni1-N1E   | 2.071(5) |
| Cu2-N1B               | 2.023(2) | Ni1-O1H   | 2.055(4) |
| Cu2-N12A              | 1.994(2) | Ni2-N19A  | 2.087(4) |
| Cu2-N12B              | 1.993(2) | Ni2-N19B  | 2.068(4) |
|                       |          | Ni2-N22A  | 2.194(4) |

|                             |                    |          |                                        |
|-----------------------------|--------------------|----------|----------------------------------------|
| N19A-Cu1-N19B <sup>i</sup>  | 135.61(10)         | Ni2-N22B | 2.157(4)                               |
| N19A-Cu1-N22B <sup>i</sup>  | 124.95(9)          | Ni2-N1D  | 2.088(5)                               |
| N22B-Cu1-N19B <sup>i</sup>  | 81.53(10)          | Ni2-O1I  | 2.086(5)                               |
| N19A-Cu1-N22A               | 81.25(9)           | Ni3-N1B  | 2.161(5)                               |
| N19B-Cu1 <sup>i</sup> -N22A | 119.53(9)          | Ni3-N12B | 2.083(4)                               |
| N22B-Cu1 <sup>i</sup> -N22A | 118.72(9)          | Ni3-N19C | 2.071(4)                               |
| N12A-Cu2-N12B               | 124.46(9)          | Ni3-N22C | 2.144(4)                               |
| N1B-Cu2-N12B                | 81.91(10)          | Ni3-N1F  | 2.103(5)                               |
| N12A-CU2-N1B                | 124.35(10)         | Ni3-N1G  | 2.103(5)                               |
| N1A-Cu2-N12B                | 125.11(9)          |          |                                        |
| N1A-Cu2-N12A                | 80.96(9)           | Ni1      | 174.38(17)<br>174.08(16)<br>172.01(18) |
| N1A-Cu2-N1B                 | 126.32(9)          | Ni2      | 176.43(18)<br>173.73(17)<br>172.89(16) |
|                             |                    | Ni3      | 177.55(19)<br>173.71(16)<br>170.30(16) |
|                             |                    |          |                                        |
| A/B                         | 6.56(6)<br>7.01(7) | A/B      | 46.34(15)<br>14.6(2)<br>29.19(15)      |

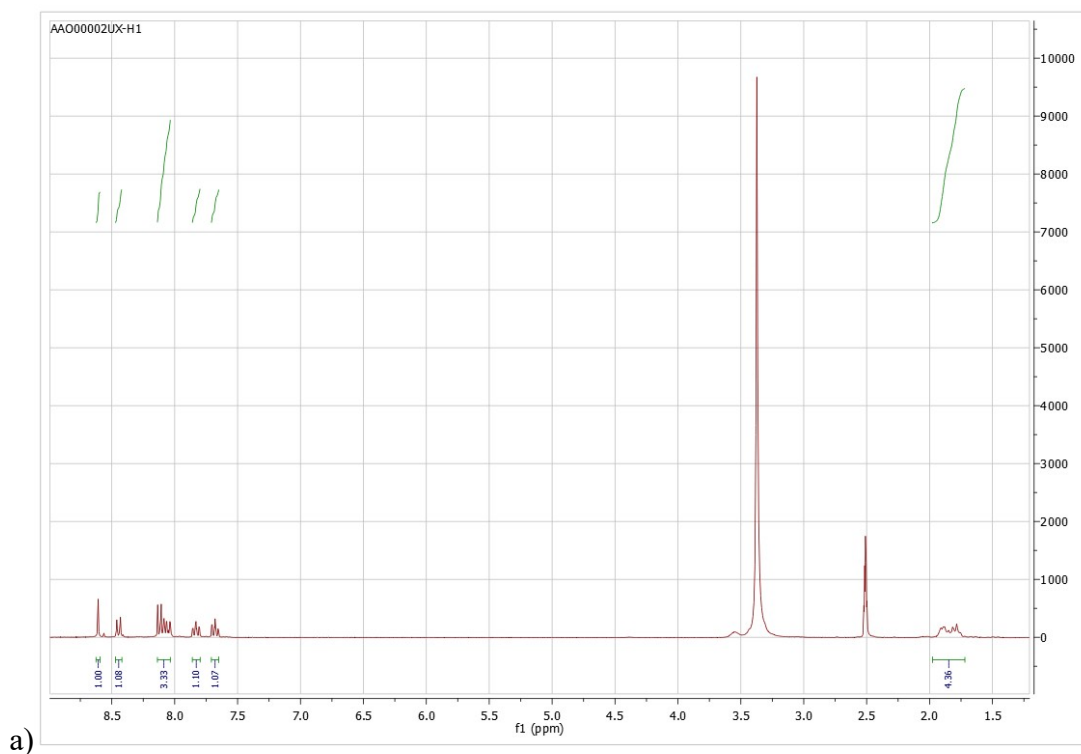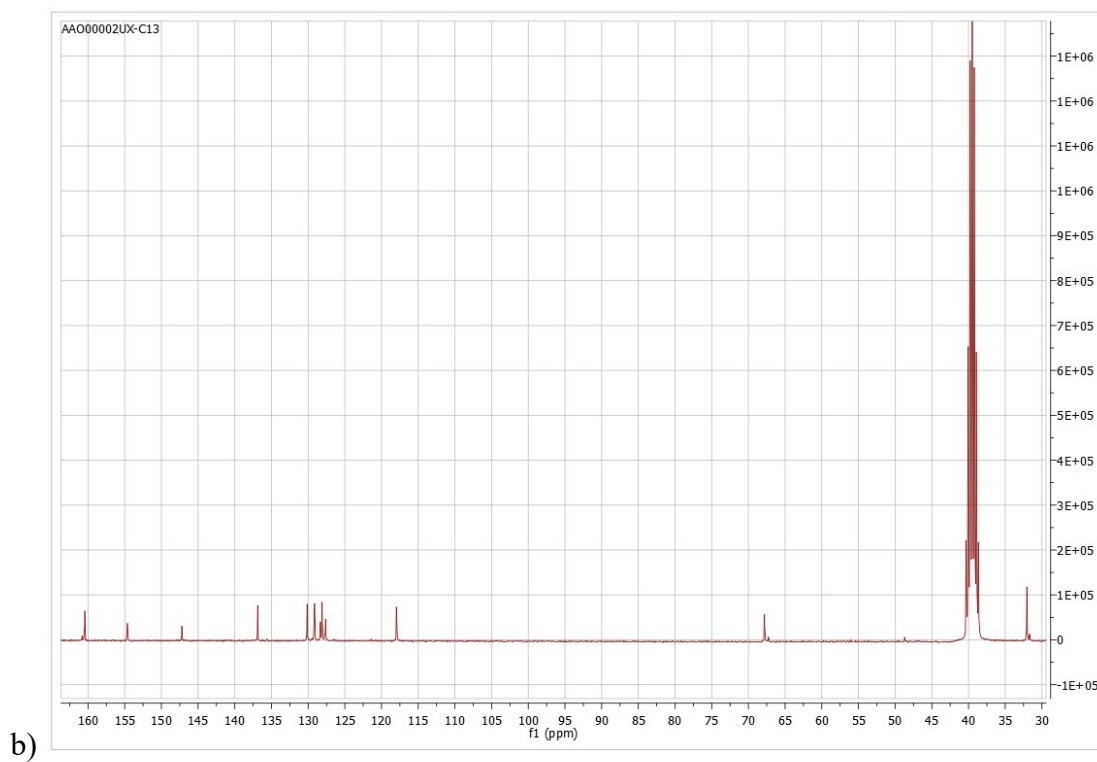

Figure S1 (a)  $^1\text{H}$  NMR (300 MHz,  $\text{DMSO-d}_6$ ) spectrum of ligand **L**:  $\delta$  (ppm) = 8.60 (s, 1H); 8.44 (d, 1H); 8.07 (m, 3H), 7.82 (t, 1H); 7.67 (t, 1H); 1.82 (dt, 4H). (b)  $^{13}\text{C}$  NMR (75 MHz,  $\text{DMSO-d}_6$ ) spectrum of ligand **L**:  $\delta$  (ppm) = 160.47; 154.67; 147.24; 136.9; 130.16; 129.16; 128.36; 128.13; 127.65; 117.95; 67.84; 32.08 (2C).

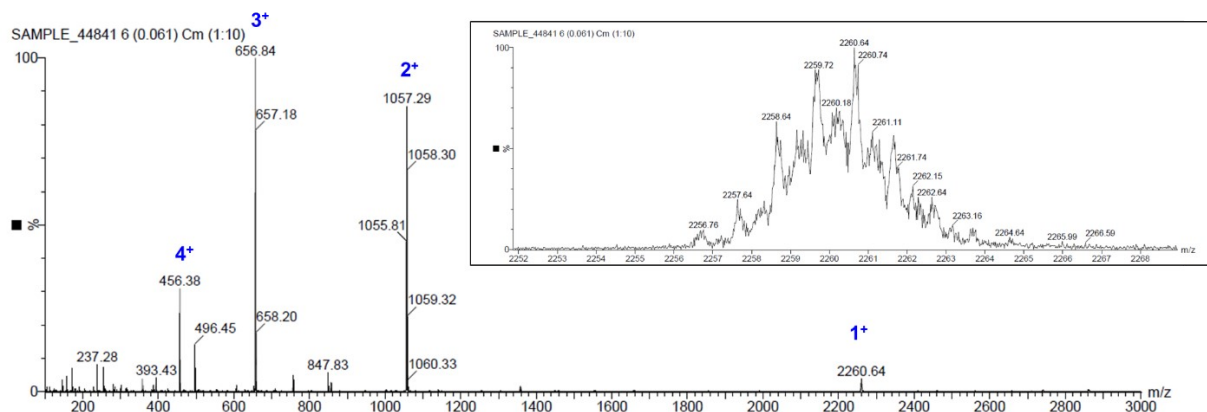

Figure S2 ESI-MS spectrum of C1.

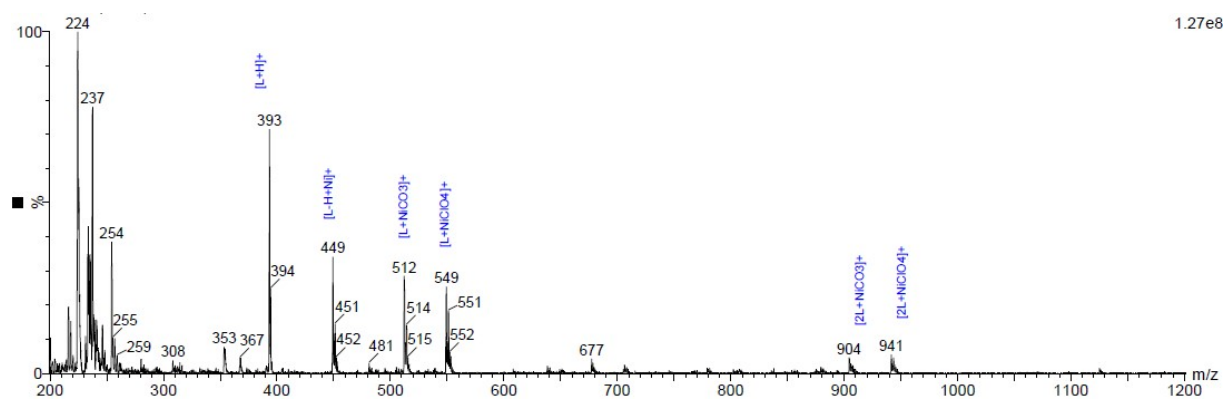

Figure S3 ESI-MS spectrum of C2.

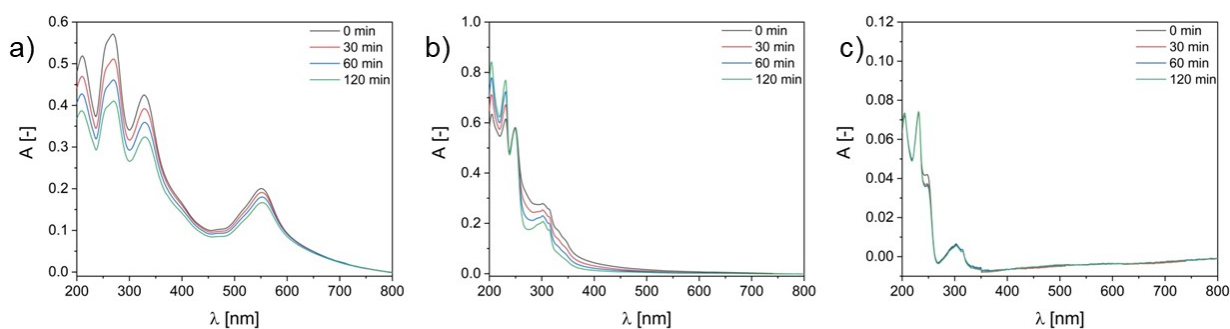

Figure S4 Stability tests complex C1 [a)], complex C2 [b)] and ligand L [c)] in Tris-HCl (5 mM Tris, 50 mM NaCl, pH = 7.22)

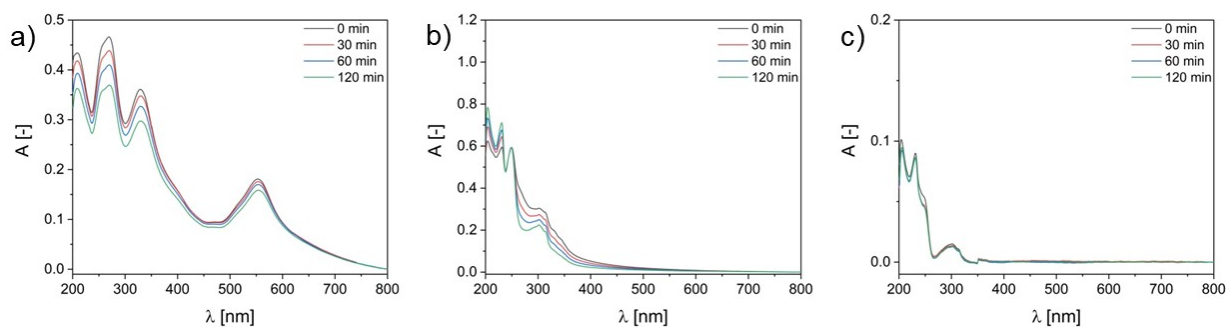

Figure S5 Stability tests complex **C1** [a)], complex **C2** [b)] and ligand **L** [c)] in PBS buffer (0.01 M phosphate buffer, 0.0027 M potassium chloride, 0.137 M sodium chloride pH = 7.4)

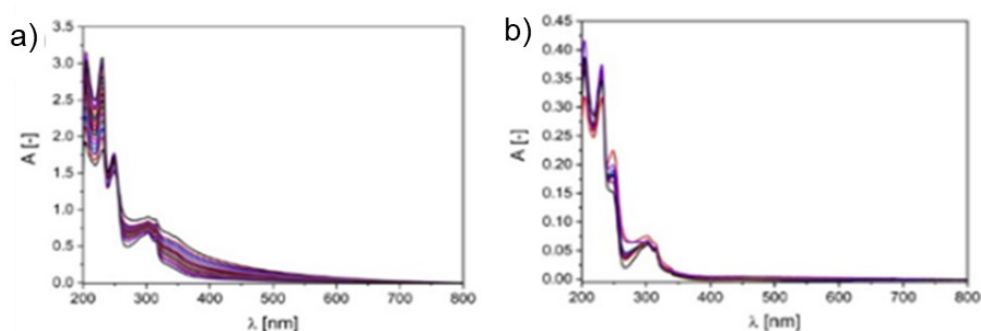

Figure S6 Absorption titration of  $[Ni_3L_3]^{6+}$  triangle **C2** (a) and **L** (b) with increasing concentrations of CT-DNA (0-100  $\mu M$ ) in buffer Tris-HCl (5 mM Tris, 50 mM NaCl, pH = 7.22).

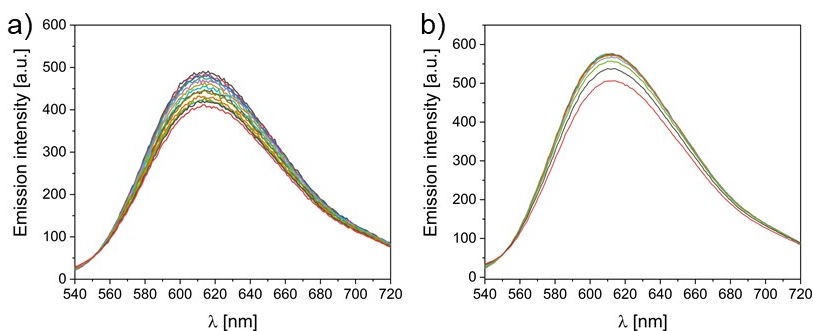

Figure S7 Emission spectra of ethidium bromide bound to CT-DNA in the presence of increasing amounts of complex **C2** (0-100  $\mu M$ , (a)) and ligand **L** (0-100  $\mu M$ ), (b)) in buffer Tris-HCl (5 mM Tris, 50 mM NaCl, pH = 7.22).

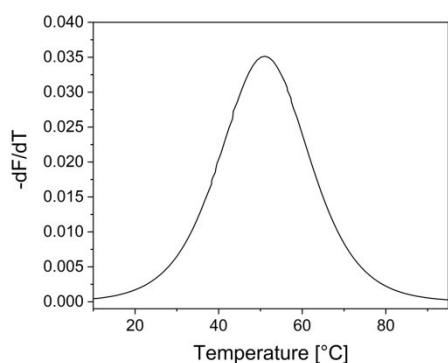

Figure S8 First derivative of the experimental melting curve of *d(GTTAATCGCTGG)* DNA alone (2.5  $\mu\text{M}$ ).

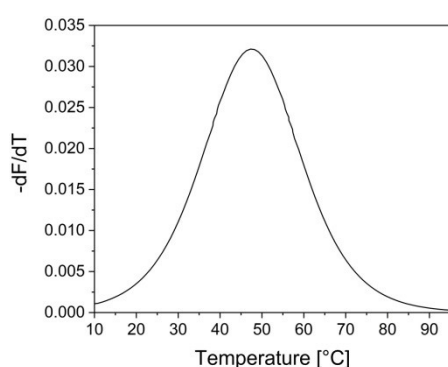

Figure S9 First derivative of the experimental melting curve of ligand **C1** (10  $\mu\text{M}$ ) and *d(GTTAATCGCTGG)* DNA (2.5  $\mu\text{M}$ ).

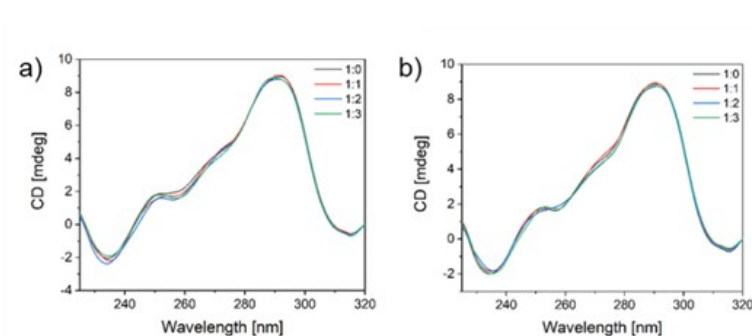

Figure S10. Tel22 folded (2  $\mu\text{M}$ ) in buffer Tris-HCl (10 mM Tris, 100 mM KCl) pH=7.5 in the presence of increasing concentration of grid **C1** (0-6  $\mu\text{M}$ , on the left) and triangle **C2** (0-6  $\mu\text{M}$ , on the right). The molar ratios of tel22:compound is presented on the graph. The folded Tel22 in  $\text{K}^+$  solutions possesses characteristic spectrum - a negative band at 240 nm, the positive band at 290 nm and the shoulder between 250-260 nm<sup>1,2</sup>. Upon addition of **C1** and **C2** the conformational changes visible in CD are only slight and seem to indicate that they do not significantly influence the secondary structure of GQ.

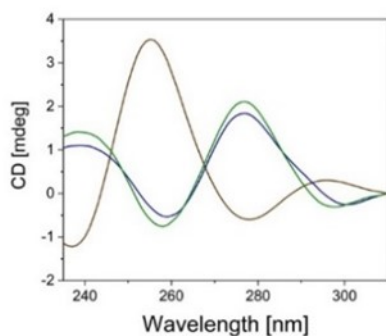

Figure S11. ICD spectra of randomly folded Tel22 ( $2 \mu\text{M}$ ) with the triangle **C2** (buffer with 10 mM Tris, pH=7.5). Molar ratios Tel22:compound: brown – 1:0; blue – 1:1; green line – 1:2. The assembly is characterized by a spectrum with positive peaks at ca. 240 nm and 280 nm and negative peaks at ca. 260 nm and 300 nm.

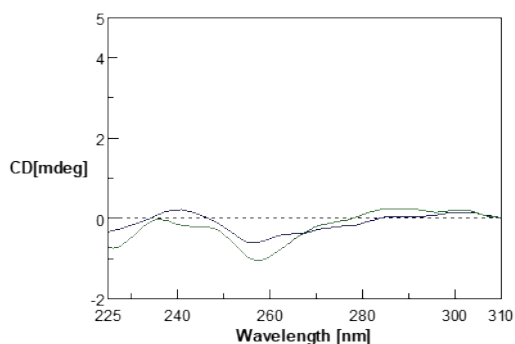

Figure S12. ICD spectra of randomly folded Tel22 ( $2 \mu\text{M}$ ) with the grid **C1** (buffer with 10 mM Tris, pH=7.5). Molar ratios Tel22:compound: blue line – 1:2; green line – 1:4.

#### References:

1. A. Ambrus, D. Chen, J. Dai, T. Bialis, R. A. Jones and D. Yang, *Nucleic Acids Res.*, 2006, **34**, 2723-2735.
2. I. Prislán, S. Sajko, N. P. Ulrich and L. Fürst, *RSC Adv.*, 2019, **9**, 41453-41461.
